# Supplementary material for: Infection and drug resistance of Streptococcus agalactiae among perinatal pregnant women in Xinjiang
Source: Research Square preprint supplement (doi:10.21203/rs.3.rs-608405/v1), 2021-06-17
Supplement: Supplementary file 1 [file 8c7b232aaf822c205cf3db66.xlsx]

## Sheet: Table1 Primers
Table 1	Primers and products of erythromycin/clindamycin-resistance genes used in conventional PCR
Primers	Sequence	length
ermA-F	5'-CGATATTCACGGTTTACCCA-3'	513bp
ermA-R	5'-CGTAATAGAAATCGGATCAGGA-3'
ermB-F	5'-ACCGATACCGTTTACGAAATTG-3'	372bp
ermB-R	5'-TTGCTGAATCGAGACTTGAGTG-3'
mreA-F	5'-ACACCTCGTCTAACCTTCGCT-3'	431bp
mreA-R	5'-GTTCGTCCTCTTAGCATCTCCAT-3'
mefA-F	5'-GTGTGCTAGTGGATCGTCATGA-3'	389bp
mefA-R	5'-ACCCAGCTTAGGAATACGTACAAT-3'
mefE-F	5'-CGTAGCATTGGAACAGC-3'	513bp
mefE-R	5'-TCGAAGCCCCCTAATCTT-3'
lin B-F	5'-CCTACCTATTGTTTGTGGAA-3′	944bp
lin B-R	5'-ATAACGTTACTCTCCTATTC-3′
erm47-F	5′-atcgattaatTAAGGAGGTCATAATATGCAAATATATG-3′	81bp
erm47-R	5′-gacctccttaATTAATCGATTGGTTTAATGAAC-3′

## Sheet: Table2 Susceptibibility Profile
Table 2. Susceptibility profile of GBS isolates (n = 149)
Antibiotic/method	Susceptible	Intermediate*	Resistant
Kirby-Bauer disk diffusion
linezolid	149 (100 %)	–	–
penicillin	149 (100 %)	–	–
vancomycin	149 (100 %)	–	–
meropenem	149 (100 %)	–	–
ampicillin	149 (100 %)	–	–
ceftriaxone	149 (100 %)	–	–
levofloxacin	67（44.97%）	19 (12.75%)	63 (42.28%)
erythromycin	51（34.23%）	5 (3.36%)	93 (62.42%)
tetracycline	84（56.38%）	26 (17.45%)	39(26.17%)
clindamycin	44（29.53%）	19(12.75%)	86 (57.72%)
* The intermediate values were assimilated to resistant

## Sheet: Table3 MLSB statics
Table 3. macrolide-lincosamide-streptograminB (MLSB)phenotypes of GBS isolates(n=127) by D tests
Phenotype	strains	Rate	E	C
cMLSB	52	0.4094	R	R
iMLSB	29	0.2283	R	S/I-R
MS	12	0.0945	R	S/I
L	34	0.2677	S/I	R

## Sheet: Table4  genes statics
Table 4. Statistical analysis of MLSB resistance genes of GBS isolates
Gene	Strains(n=149)	Strains(n=127)
ermB	119(79.87%)	109(85.83%)
ermA	9(6.04%)	9(7.09%)
mreA	135(90.60%)	118(92.91%)
linB	40(26.85%)	40(31.50%)
mefA/E	96(64.43%)	94(74.02%)
erm (47)	3(2.01%)	3(2.36%)

## Sheet: Table5 details of MIC  MLS and 
Table.5 Relationship of phenotype to genotype in phenotypically macrolide-resistance GBS isolates（n=127）
Phenotype	strains/(%)	genes(strains)
cMLSB(E-R,C-R)	52(40.94%)	ermA(5),mreA(1),linB(36),mefA/E(46),ermB+mreA(51)
iMLSB(E-R,C-S)	29(22.83%)	ermB(3),ermA(1),mreA(10),mefA/E(6),ermB+mreA(13),erm47(2)
M(E-R,C-S)	12(9.45%)	ermB+mreA(12),erm47(1)
L(E-S,C-R; E-I,C-R)	34(26.77%)	ermB(1),ermA(3),mreA(2),linB(4),mefA/E(15),ermB+mreA(29)
E：Erythromycin，C：Clindamycin,S：sensitive，I：immediate，R：resistant
